# Supplementary material for: Covid-19 diagnosis by combining RT-PCR and pseudo-convolutional machines to characterize virus sequences
Source: Research Square preprint supplement (doi:10.21203/rs.3.rs-97826/v1), 2020-10-27
Supplement: Supplementary file 1 [file 57448cc99f7fab0f88f418bc.pdf]

# Optimizing the molecular diagnosis of Covid-19 by combining RT-PCR and a pseudo-convolutional machine learning approach to characterize virus DNA sequences

Juliana Carneiro Gomes<sup>a</sup>, Aras Ismael Masood<sup>b</sup>,  
Leandro Honorato de S. Silva<sup>a,c</sup>, Janderson Ferreira<sup>a</sup>, Agostinho A. F. Júnior<sup>a</sup>,  
Allana Lais dos Santos Rocha<sup>a</sup>, Letícia Castro<sup>a</sup>, Nathália R. C. da Silva<sup>a</sup>,  
Bruno J. T. Fernandes<sup>a</sup>, Wellington Pinheiro dos Santos<sup>d,\*</sup>

<sup>a</sup>*Programa de Engenharia da Computação, Escola Politécnica da Universidade de Pernambuco, POLI-UPE, Recife, Brazil*

<sup>b</sup>*Information Technology Department, Technical College of Informatics, Sulaimani Polytechnic University, Sulaymaniyah, Iraq*

<sup>c</sup>*Instituto Federal de Educação, Ciência e Tecnologia da Paraíba, Campus Cajazeiras, IFPB, Cajazeiras, Brazil*

<sup>d</sup>*Departamento de Engenharia Biomédica, Universidade Federal de Pernambuco, DEBM-UFPE, Recife, Brazil*

---

## Abstract

The proliferation of the SARS-Cov-2 virus to the whole world caused more than 250,000 deaths worldwide and over 4 million confirmed cases. The severity of Covid-19, the exponential rate at which the virus proliferates, and the rapid exhaustion of the public health resources are critical factors. The RT-PCR with virus DNA identification is still the benchmark Covid-19 diagnosis method. In this work we propose a new technique for representing DNA sequences: they are divided into smaller sequences with overlap in a pseudo-convolutional approach, and represented by co-occurrence matrices. This technique analyzes the DNA sequences obtained by the RT-PCR method, eliminating sequence alignment.

---

\*Wellington Pinheiro dos Santos

*Email address:* `wellington.santos@ufpe.br` (Wellington Pinheiro dos Santos)

*URL:* `jcg@ecomp.poli.br` (Juliana Carneiro Gomes), `aras.masood@spu.edu.iq` (Aras Ismael Masood), `leandro.silva@ifpb.edu.br` (Leandro Honorato de S. Silva), `jrb@ecomp.poli.br` (Janderson Ferreira), `aafj@ecomp.poli.br` (Agostinho A. F. Júnior), `alsr@ecomp.poli.br` (Allana Lais dos Santos Rocha), `lcpo@ecomp.poli.br` (Letícia Castro), `nrcs@ecomp.poli.br` (Nathália R. C. da Silva), `bjtf@ecomp.poli.br` (Bruno J. T. Fernandes)

Through the proposed method, it is possible to identify virus sequences from a large database: 347,363 virus DNA sequences from 24 virus families and SARS-Cov-2. Experiments with all 24 virus families and SARS-Cov-2 (multi-class scenario) resulted  $0.822222 \pm 0.05613$  for sensitivity and  $0.99974 \pm 0.00001$  for specificity using Random Forests with 100 trees and 30% overlap. When we compared SARS-Cov-2 with similar-symptoms virus families, we got  $0.97059 \pm 0.03387$  for sensitivity, and  $0.99187 \pm 0.00046$  for specificity with MLP classifier and 30% overlap. In the real test scenario, in which SARS-Cov-2 is compared to Coronaviridae and healthy human DNA sequences, we got  $0.98824 \pm 0.01198$  for sensitivity and  $0.99860 \pm 0.00020$  for specificity with MLP and 50% overlap. Therefore, the molecular diagnosis of Covid-19 can be optimized by combining RT-PCR and our pseudo-convolutional method to identify SARS-Cov-2 DNA sequences faster with higher specificity and sensitivity.

*Keywords:* Covid-19 diagnosis, Covid-19 molecular diagnosis, DNA sequences representation, pseudo-convolutional methods, RT-PCR optimization

## 1. Introduction

At the end of 2019, the proliferation of the SARS-Cov-2 virus appeared in the city of Wuhan, China (Zhou et al., 2020). In a few months, there are more than 250,000 deaths worldwide and over 4 million confirmed cases (WHO, 2020b). Covid-19, as it became known, is a respiratory syndrome. In moderate cases, it manifests clinically as pneumonia. In critical cases, a disease can lead to respiratory failure, septic shock, and/or multiple organ dysfunction (MOD) or failure (MOF) (Cascella et al., 2020; Peeri et al., 2020; Wang et al., 2020a).

Besides the severity of the disease, the exponential rate at which the virus proliferates is an aggravating factor. The transmission of the virus often occurs through asymptomatic people. The contagion is given by drops or secretions from sneezing or coughing (Cascella et al., 2020). Because of this, many countries have been experiencing overcrowding in their hospital centers. Most medical professionals are working long hours, and the number of pulmonary ven-

15 tilators is not enough for all patients. This scenario has led dozens of countries to adopt measures of social isolation. They attempt to contain the dissemination, and to mitigate the number of people who need hospitalization (Hellewell et al., 2020; Wilder-Smith & Freedman, 2020; Kraemer et al., 2020).

In response to this growing pandemic, several companies and research centers worldwide have researched and developed methods for diagnosing Covid-19 (Wang et al., 2020b). Among them, rapid tests emerged, which can provide results in about 30 minutes. One type of rapid test is the Rapid Diagnostic Test (RDT). Through samples from the patient's respiratory tract, RDT seeks to detect the presence of antigens. Antigens are substances that are foreign to the body, causing immune responses. These responses produce specific antibodies, capable of binding to and interacting with the antigen, ensuring the protection of the organism. Thus, in tests of the RDT type, antibodies are fixed on paper tapes and placed in plastic capsules, similar to the well-known pregnancy tests. If the target antigen is present in the patient's sample at certain concentrations, it will attach to the antibodies on the tape, generating a visual signal. Unfortunately, this method has some restrictions. First, it is only possible to detect in the acute stages of infection, when antigens are expressed. In addition, efficiency depends on factors such as quality and the collection protocol and the formulation of reagents. We must also emphasize that the possibility of false positives, when the antibodies present on the tape recognize antigens from other types of viruses. For these reasons, the sensitivity of the RDT can vary from 34 to 80% (Bruning et al., 2017; WHO, 2020a).

Another type of rapid test is based on host antibody detection. In this case, antibodies are detected in the patient's blood samples, depending on factors such as age, nutrition, disease severity and medications. However, recent studies have shown that the immune response is very weak, late or even absent in many cases of patients confirmed with Covid-19 (Döhla et al., 2020; Patel et al., 2020; Burog et al., 2020; Li et al., 2020; Liu et al., 2020; Zhang et al., 2020; Pan et al., 2020). This means that this type of detection is often only possible in cases of recovered patients. The study (Long et al., 2020) reports 285 patients who tested

positive for IgG. However, these immune responses were seen 19 days after the first symptoms. This condition makes testing ineffective in many situations, as opportunities for treatment and clinical interventions no longer exist. Therefore, WHO does not currently recommend these types of rapid diagnostic tests for Covid-19. The suggestion is to use them in research contexts or as a way of screening patients, or of potential diagnosis (WHO, 2020a).

Therefore, the benchmark for Covid-19 diagnosis is molecular diagnosis or RT-PCR with DNA sequencing and identification (Patel et al., 2020; Tahamtan & Ardebili, 2020). Throat swab samples are usually collected from suspected patients in this type of analysis. The samples are then placed in tubes with virus preservation solutions, where the genetic material of the virus can be extracted. In this case, the single-stranded RNA. In the first phase, reverse transcription occurs, where a complementary DNA molecule (cDNA) to the virus RNA is synthesized. This process takes place through the DNA polymerase enzyme. The RNA is then removed, and the Taq DNA polymerase enzyme produces double-stranded DNA, which is a copy of the virus's RNA. Then, the PCR exponentially amplifies fragments of this DNA during successive cycles, generating millions of copies to be analyzed. In the following, the cDNA is aligned with sequences from the SARS-Cov2 virus. Sequence alignment is a traditional method for analyzing similarity between sequences. Among the most consolidated methods are BLAST and FASTA. If there is a match between both sequences, then the patient is confirmed positive. Otherwise, the patient is considered negative for Covid-19 (Bosco & Di Gangi, 2016; Rizzo et al., 2015; Zhang & Harmon, 2020; Chan et al., 2020).

Although so far RT-PCR with DNA identification is considered the most accurate and effective method, there are still some weaknesses. A major limitation of the sequence alignment methods is the computational complexity and time consumption. In many cases, patients can take days to receive the diagnosis due to sample preparation and genomic analysis. Because of this, several studies have proposed alignment free methods for genomic sequences classification. Most of these methodologies involve a feature extraction method such as spec-

tral representation of DNA sequences. Thus, the representative attributes of the sequence can be combined with methods of artificial intelligence, especially machine learning. This makes possible to separate each analyzed sequence into a  
80 class (Covid-19 positive or Covid-19 negative, for example) (Bosco & Di Gangi, 2016; Rizzo et al., 2015).

In this work we propose a new technique for representing sequences based on the analysis of the relationships between nitrogenous bases. This technique analyzes the DNA sequences obtained by the RT-PCR method, eliminating the  
85 alignment process. The idea is as follows: a DNA sequence is divided into  $n$  smaller sequences. Each subsequence  $i$  is superimposed with a part of the subsequence  $i - 1$  and with a part of the subsequence  $i + 1$ , giving rise to two new subsequences. These smaller sequences are represented by co-occurrence matrices. The matrices are square with  $4 \times 4$  dimensions, with number of rows and columns  
90 corresponding to each of the nitrogenous bases of DNA (Adenine, Cytosine, Thymine, and Guanine). The co-occurrence matrix considers the occurrence of each of the bases, as well as the relationship between bases and their immediate neighbors. Then, the co-occurrence matrices are stacked together, forming a volume. Considering that the sequences can be subdivided into smaller and  
95 smaller subsets, with the formation of new co-occurrence matrices, the proposed method has a pseudo-convolutional aspect from the algorithmic point of view. After obtaining the set of matrices, they are then concatenated, forming attribute vectors. These extracted attributes correspond to a high-level vectorial representation of the initial DNA sequence, independent from the size of the  
100 sequence. This feature vector can be classified by machine learning techniques.

Through the proposed method, it is possible to identify virus sequences from a relatively large database. Several advantages can be pointed out with this approach: First, it is not necessary to pre-align the sequence under investigation in relation to the reference sequences; Second, the sequence under study is  
105 compared with a wide set of sequences of given classes, and not just with a reference sequence, strengthening the reliability of the test. We also emphasize that the method can be applied to sequences of any size.

The present work seeks to describe and test the new method of feature extraction to represent sequences of nitrogenous bases. Our main objective is to optimize the RT-PCR, the benchmark for Covid-19 diagnosis. To reach this goal, we used genomic sequences of different viruses obtained in the repository VIPR (Virus Pathogen Resource) Pickett et al. (2012). We used 24 virus families with more than 500 sequences each, including the SARS-Cov2 family. Each sequence was submitted to the representation process described here. In the following, we performed multiple experiments with different machine learning methods. (method) presented a superior performance, considering four metrics (accuracy, kappa index, sensibility and specificity).

This work is organized as following: in section 2 we present a brief of the state-of-the-art of DNA methods; in section 3 we present our methodology, including our proposal, the description of the database, the experiments parameters and the metrics used for performance measure. In section 4 we provide our experiments results and make analysis of them; finally, in section 6 we summarized the scientific contribution of this work and discusses the potential future work.

## 2. Related works

Several studies have sought to optimize the diagnosis of Covid-19 through the provision of rapid tests. The most common methods are based on the use of antibodies. Li et al. (2020) proposed a simple and rapid test for the combined detection of IgG and IgM antibodies. Both antibodies are indicative of infection. However, immunoglobulins M provide an immediate response to viral infections, and it can be detected in a period of 3 to 6 after infection. Immunoglobulin G, on the other hand, is important for the body's long-term immunity or immune memory. With this in mind, they developed a test capable of detecting IgM and IgG simultaneously in blood samples, allowing detection in a longer time window. For the development of the rapid test, the authors collected samples from eight different laboratories and hospitals in China, with a total of 397

patient samples positive for Covid-19, and 128 negative samples. These results were confirmed by the RT-PCR technique using a respiratory tract specimen. Blood samples from patients were pipetted into the test kit, followed by two or  
140 three drops of dilution buffer. After 15 minutes it was possible to analyze the result using three markers. The first marker (letter C) or line on the display appears red when the sample is negative. The presence of IgG and IgM is indicated by red or pink lines in the regions with the letters M and G in the kit, and both antibodies may be present in the sample. The tone of the line is also  
145 indicative of the level of concentration of each type of antibody. Among the samples analyzed, the tests showed 88.66% sensitivity and 90.63% specificity. These values can be considered high, in comparison with results obtained in other studies (Cassaniti et al., 2020). The work also tested the performance of the method in 10 patients using peripheral blood. The results remained  
150 reliable. Thus, the work is promising and points out an interesting path for a simple and quick diagnosis, which can be an alternative for extensive testing of the population. However, the study does not point to tests with other types of viruses similar to SARS-Cov2, such as common flu. Given the similarity between viruses, the tests may indicate false positives, where the antibodies  
155 bind to similar antigens to SARS-Cov2.

Unlike rapid tests based on the detection of antigens, other works have sought to incorporate computational intelligence techniques in the diagnosis of Covid-19. Many of them have invested in automatic classification based on x-ray images making use of Deep Learning techniques, especially CNNs (Apostolopoulos  
160 & Mpesiana, 2020; Narin et al., 2020; Sethy & Behera, 2020). Apostolopoulos et al. (2020) applied these techniques to distinguish Covid-19 from other lung diseases, such as viral and bacterial pneumonias, pulmonary edema, pleural effusion, chronic obstructive disease, and pulmonary fibrosis. This study used a wide database with 3905 x-ray images, including approximately 450 cases of  
165 Covid-19. For model training, the images were scaled to 200x200 pixels. Small variations of the images were also considered. That is, the images were slightly rotated, in order to make the model robust to variations in position and orienta-

tion that may occur in the image acquisition process. To extract characteristics from the images, some models of convolutional networks (CNN) of the Mobile Net type were tested. Three techniques were compared: development of a new CNN architecture; application of a pre-trained CNN (Transfer Learning); and a hybrid method, which applies tuning strategies to specific layers of a pre-trained CNN. The experiments were carried out in Python, using the Keras library and TensorFlow as a backend. Among the tested configurations, the CNN developed from scratch showed the best results, suggesting that biomarkers related to Covid-19 can be found with the technique. The model achieved an average rating accuracy of 87.66%, considering all six classes. With special regard to Covid-19, the model achieved 99.18% accuracy, 97.36% sensitivity, and 99.42% specificity.

Gomes et al. (2020) also proposed the use of machine learning techniques for classification of x-ray images, distinguishing between Covid-19, viral pneumonia, bacterial pneumonia and healthy patients. In contrast to the previous work, the authors invested in low-cost computational methods. Thus, the authors tested Haralick and Zernike moments for extracting attributes and used classic classifiers, such as MLP, SVM, decision trees and Bayesian networks. The work points out that the chosen extractors can play an important role in the diagnosis by image. The reason for this is that in clinical practices it is common to find opaque and whitish areas in contexts of pneumonia. Finally, SVM reached the best performance. The authors reached an average accuracy of 89.78%, average recall and sensitivity of 0.8979, and average precision and specificity of 0.8985 and 0.9963 respectively. An initial desktop version of the system was developed and made available for free non-commercial use on Github.

On the other hand, other studies have invested in Covid-19 diagnostic methods through intelligent systems based on blood tests. Methods like this can be useful mainly in contexts of unavailable rapid tests, functioning as a patient screening process. For the development of the this work, Soares et al. (2020) used a database made available by the Israeli Hospital Albert Einstein, located in São Paulo, Brazil. The database has 108 clinical exams and data from 5644



patients. The authors chose 599 patients, who had few missing data (at least 16  
 200 tests performed). Among them, 81 had a positive result for Covid-19 by the RT-PCR method. In addition, they selected tests that can be performed quickly in an emergency context. The selected blood tests were complete blood count, creatinine, potassium, sodium, C-reactive protein, in addition to the patient's age. Considering the imbalance of the database, the work used SMOTE techniques  
 205 (Synthetic Minority Oversampling Technique) (Chawla et al., 2002; Lusa et al., 2013), which is capable of generating synthetic data from the minority class. Then they trained 10 support vector machines (SVM). The initial prediction model corresponds to the average probability of the 10 models developed. The testing and training processes were performed 100 times, using different subsets,  
 210 with a 90% percentage split for training and 10% for testing. All models and statistics were obtained using R. The authors achieved an average specificity of 85.98%, an average sensitivity of 70.25%, a negative predictive value (NPV) of 94.92%, and a positive predictive value (PPV) of 44.96%. For the last metric, the authors believe that severe cases, however negative for Covid-19, generated  
 215 more confusion in the classification. Another study Barbosa et al. (2020), using the same initial database, applied attribute extraction methods (Particle Swarm Optimization) to search for the best tests among the 108 initial ones. Then, the authors manually selected exams in order to reduce costs. The result was 24 selected exams, with performance similar to the initial base. The results of the  
 220 evaluation metrics were: 95.16% of average accuracy, sensitivity of 0.969, specificity of 0.936 and 0.903 of kappa index. The authors made a desktop version of the system available for free non-commercial use.

While rapid diagnostic methods are important and optimize this process, the gold standard and recommendation of WHO is still the RT-PCR method  
 225 with DNA sequencing (WHO, 2020a), similar to the method developed for the diagnosis of SARS-Cov (Chan et al., 2004; Emery et al., 2004; Corman et al., 2012). Thereby, multiple studies and protocols for identifying SARS-Cov2 by molecular diagnosis have already been published (Corman et al., 2020b,a; Poon et al., 2020; Chu et al., 2020; Nao et al., 2020). Chu et al. (2020) developed

230 RT-PCR assays to detect SARS-Cov2 in human clinical samples. The authors  
relied on the first publication of the virus sequence on Genbank, in addition to  
sequences of other types of coronavirus to perform the alignment. Thus, they  
designed two monoplex assays, which target the ORF1b and N gene regions.  
Then, these primer and probe sequences were confirmed with other released  
235 SARS-Cov2 sequences. RT-PCR reactions were performed by a thermal cycler,  
using typical reaction mixture, forward and reverse primers, probe, and RNA  
sample. RNA and DNA purification kits were also used for extraction. The time  
for each RT-PCR run was about 1h and 15 min. In order to determine assays  
specificity, they used negative control samples with RNA extracted from other  
240 viruses (MERS, camel coronavirus, influenza A and B, adenovirus, enterovirus,  
rhinovirus, etc.) and from healthy patients. In contrast, all viruses belonging to  
the Sarbecovirus subgenus (SARS-like coronaviruses, and other coronaviruses)  
were considered positive in these assays. This decision was made due to the  
small amount of data available from SARS-Cov2 at the time of the development  
245 of the work. The study tested the method on two patients with suspected  
SARS-Cov2 infection. The samples were taken from different locations (sputum  
vs. throat swab) and at different infection periods (day 5 vs. day 3). Both  
patients received a positive result. Finally, the study results demonstrated the  
clinical value of respiratory samples for molecular diagnosis of Covid-19. The  
250 authors also observed a high sensitivity of the N gene for detecting the disease,  
being recommended as a screening assay, and the Orfb1 as a confirmatory one.  
The biggest difficulty, however, is that RT-PCR is time-consuming and labour  
intensive, and consequently, its result can take days to be available (Ai et al.,  
2020). This makes clinical conduct difficult and favors the contamination of  
255 more people by SARS-Cov2. In this sense, the objective of this work is to  
propose an optimization of the gold standard method.

### 3. Materials and methods

#### 3.1. Proposed method

Our work considers genome sequences of several virus types, where each  
sequence is organized into a single matrix. Initially, the genome sequence is  
divided into  $n$  subsequences, which will then be overlapped with its neighbors.  
In the overlapping process, a parameter received by the method determines the  
size of the superimposed pieces. Every subsequence  $i$  is combined with a piece  
of the subsequence immediately to its left  $i - 1$ , and also with a piece of the  
one to its right,  $i + 1$ . An exception is made for the first and last sequence of  
the matrix, given that they have only one subsequence from which to take a  
piece. This procedure results in two new sequences for each of the subsequences  
generated from the original genome.

After that, these smaller sequences are represented by co-occurrence matrices.  
The matrices are square with  $4 \times 4$  dimensions. Each element of the matrix  
represents the number of occurrences of a given pair of nucleotide bases, as  
well as the relationship between bases and their immediate neighbors. These  
elements are AA, AC, AT, AG, CA, CC, CT, CG, TA, TC, TT, TG, GA, GC,  
GT, and GG. The matrix is then normalized, where its maximum value is used  
to divide each of its elements.

Finally, all the  $4 \times 4$  matrices are stacked together, forming a volume  $4 \times 4 \times m$ ,  
wherein  $m$  is the number of subsequences resultant from the overlapping process.  
In general terms:

$$m = (n - 1) \times 2 \quad (1)$$

After obtaining this set of matrices, they are then concatenated, forming  
attribute vectors. These extracted attributes correspond to a high-level vectorial  
representation of the initial DNA sequence, independent from its size.

This process is illustrated in the following diagram in Figure 1.

#### 3.2. Classifiers

In order to verify the proposed method's efficiency in extracting character-  
istics from genome, different classifiers will process the data. The following

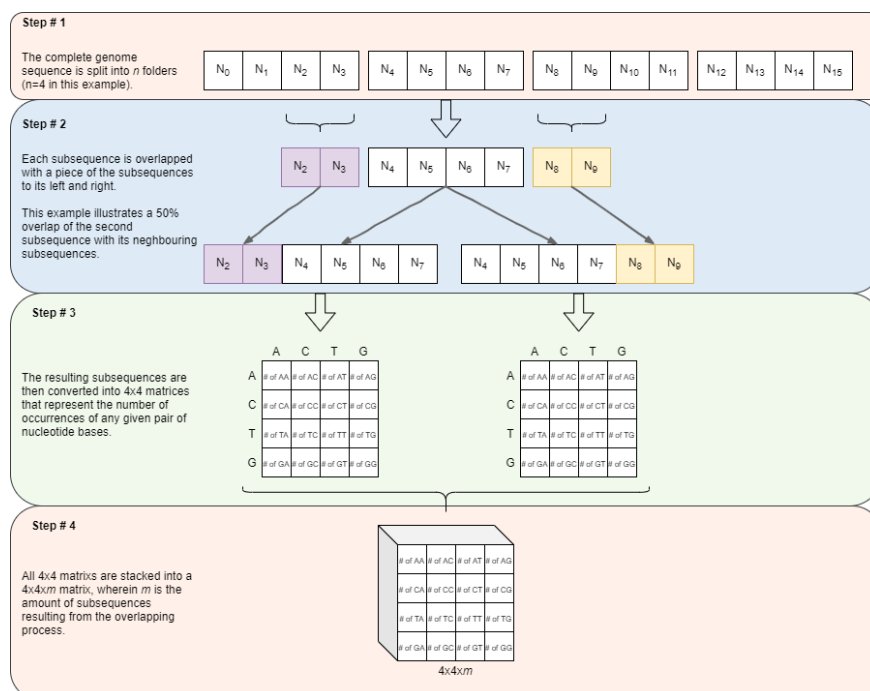

Figure 1: Steps of the proposed method: a new technique for representing genome sequences based on the analysis of the relationship between nitrogenous bases. It works as follows: the complete genome sequence is subdivided into  $n$  folders. Each subsequence is combined with a piece of its neighbors, generating two new sequences. These smaller sequences are represented by co-occurrence matrices, considering the occurrence of each of the nitrogenous bases, and the relationship between bases and their immediate neighbors. In the next step, theses matrices are stacked together as a volume. Finally, this set in concatenated, forming attribute vectors, which are a high-level vectorial representation of the original sequence.

classifiers were selected because they are widely used in machine learning.

### 3.2.1. Random Forest

285 This classifier uses decision trees as its building blocks, Tin Kam Ho (1995).  
 Decision trees, as illustrated in Figure 2, iteratively separate data by testing a  
 property at a time, the resulting leafs representing the most specific category,  
 and the root representing the raw data. The Random Forest is constructed of  
 many such trees, that all have its own class prediction to any given input. The  
 290 class with the most votes is the Random Forest's output.

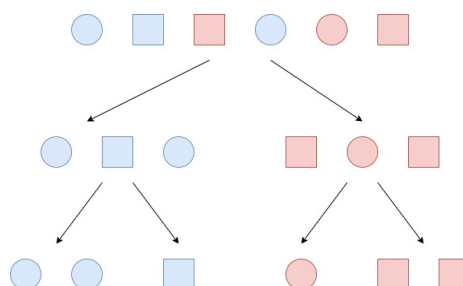

Figure 2: This decision tree example illustrates the classification of samples by two different features, colour and then shape.

As the characteristics that divide the genomes evaluated aren't known, this method is advantageous because it verifies many possibly relevant properties. Thus, it can test and locate differences in the genetic code in question.

### 3.2.2. Naïve Bayes Classifier

295 This machine learning model uses probability, specifically the Bayes theorem, Maron (1961). The Bayes Theorem defines the probability of an event A happening, given that another event B has already taken place. The Bayes Theorem can be expressed as:

$$P(A|B) = \frac{P(B|A)P(A)}{P(B)} \quad (2)$$

300 It is called naive because it assumes independence in the features that lead to the events. Furthermore, it assumes all predictors have an equal weight. This approach is beneficial because it explores the possibility that the genomes have dividing properties that are not correlated. Should that be the case, this classifier might yield good results.

### 3.2.3. Instance Based Learner

305 This algorithm, also known as IBK, Altman (1992), doesn't construct a model, but instead predicts by using a distance  $k$  between samples in the training set and a test sample. The training set instances selected generate the prediction, as demonstrated in Figure 3. It could prove to be successful, be-

cause it classifies by finding similar instances. Thus, it might be able to identify  
 310 genome sequences that belong to the same virus.

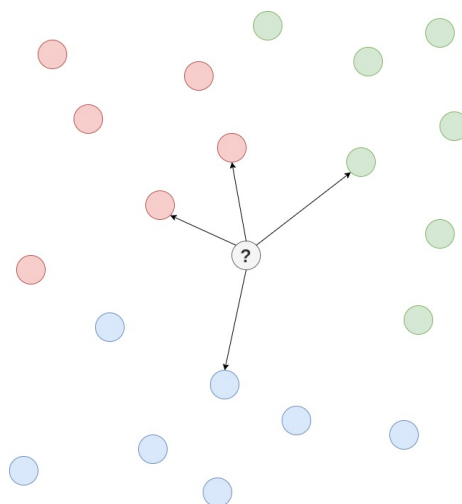

Figure 3:

#### 3.2.4. Multilayer Perceptron

This classifier, shown in Figure 4, is a neural network capable of solving non  
 linear data problems, Minsky & Papert (1969). Each neuron unit has weights  
 that multiply the input, which is in turn processed by an activation function to  
 315 generate the output. The weights are adjusted until the network can satisfy a  
 certain accuracy in output. In this manner, it could identify the features that  
 are particular to each class.

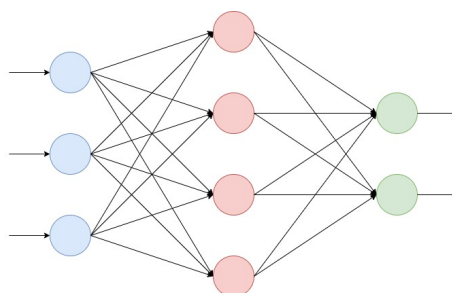

Figure 4: A multilayer perceptron with three layers of neurons.

### 3.2.5. Support Vector Machine

This algorithm, Cortes & Vapnik (1995), hopes to find an optimal hyperplane that can separate the data into classes, as exemplified in Figure 5. The plane will have  $n$  dimensions, according to the number of features. The support vectors are the samples closest to the dividing hyperplane, that aid in its construction. Thus, it could be used to classify the genomes by dividing them with such a hyperplane.

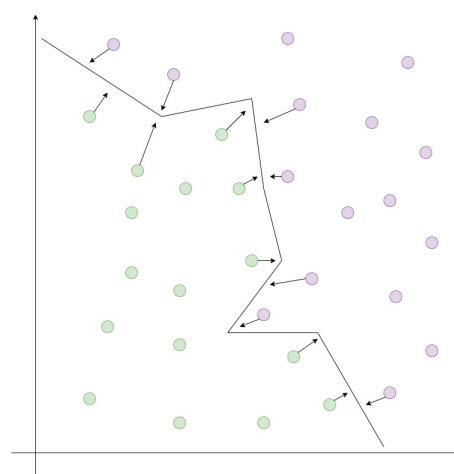

Figure 5: A binary classification problem, wherein the hyperplane created by the support vector machine has 2 dimensions.

### 3.3. Database

Twenty-five different viruses were used to evaluate the efficiency of the feature extraction method, including the SARS-Cov2 Cleemput et al. (2020). Data was obtained from the NIAID Virus Pathogen Database and Analysis Resource (ViPR) Pickett et al. (2012), which features multiple whole-genome sequences (WGS) from several viruses. Table 1 displays the number of examples per virus for each of the selected viruses.

The viruses have different sample sizes, ranging from 42, as is the case for Phasmaviridae, to 216,223, for Hepatitis C. The bar graphs below depict the distribution of sample sizes in both a linear and a logarithmic scale.

| <b>Virus</b>      | <b>Instances</b> |
|-------------------|------------------|
| Phasmaviridae     | 42               |
| <b>SARS-CoV-2</b> | <b>171</b>       |
| Hepeviridae       | 643              |
| Poxviridae        | 697              |
| Ebola virus       | 768              |
| Nairoviridae      | 7977             |
| Filoviridae       | 869              |
| Zika virus        | 919              |
| Lassa virus       | 1110             |
| Pneumoviridae     | 1831             |
| Arenaviridae      | 1840             |
| Togaviridae       | 1983             |
| Caliciviridae     | 2010             |
| Paramyxoviridae   | 2609             |
| Rhabdoviridae     | 2621             |
| Hantaviridae      | 2785             |
| Phenuiviridae     | 3089             |
| Peribunyaviridae  | 3245             |
| Coronaviridae     | 3256             |
| Enterovirus       | 3784             |
| Dengue            | 5885             |
| Picornaviridae    | 5894             |
| Flaviridae        | 14658            |
| Reoviridae        | 62454            |
| Hepatitis C virus | 216223           |

Table 1: Number of instances in each class of virus.

335 The second dataset used in this paper is from the Genome Reference Consortium Consortium (2013). Its purpose was to represent the human genome, and it has 103,959 samples.

### 3.4. Experiment setups

Various experiments were constructed to evaluate feature extraction method's  
340 quality. They aim to simulate different use cases wherein SARS-CoV2 could need to be identified. There is a multiclass experiment, a binary classification, classification of viruses with similar symptoms and a real test scenario.



### 3.4.1. Multiclass Classification

This experiment's purpose is to differentiate SARS-CoV2 and the other  
 345 viruses listed in table 1 from each other. In it, all 25 classes of the table 1  
 were used to build the database, that was split in training set and test set. In  
 classes with more than 500 instances, the training set consisted of 500 them,  
 and the rest were used in testing. The classes with less than a 500 samples had  
 70% of their samples allocated for training and 30% for testing. Additionally,  
 350 the feature extraction hyperparameter  $n$  was set to 4, and overlap was tested  
 at 30%, 50%, and 70%.

### 3.4.2. Binary Classification

This test was utilized to analyze the proposed method's efficiency in differ-  
 entiating SARS-CoV2 from Coronaviridae. Viruses from the same family could  
 355 potentially be challenging to classify when compared because they have a more  
 similar genome. To account for that scenario, the two classes with their genomes  
 are contrasted only to each other. Train and test splitting was performed ex-  
 actly as in the multiclass evaluation. The feature extraction hyperparameter  
 $n$  was set to 4, and overlap was set to 30%, a percentage that was previously  
 360 shown to represent the virus genome sequences satisfactorily.

### 3.4.3. Viruses with similar symptoms

A third test was outlined to classify viruses with similar symptoms to SARS-  
 CoV2. This should prove useful in determining if a patient has symptoms that  
 indicate they might have SARS-CoV2, but other possibilities cannot be ruled  
 365 out. Four classes were established: SARS-CoV2; Coronaviridae; Paramyxoviri-  
 dae; Peneumoviridae, Hantaviridae, Enterovirus, and Nairoviridae. The train  
 and test splits and the hyperparameter  $n$  were maintained as in previous tests.  
 Overlap was set to 30%, 50%, and 70%.

### 3.4.4. Real test scenario

370 This test included three classes: the human genome, from the Genome Ref-  
 erence Consortium Consortium (2013), SARS-CoV2 and the other viruses from

table 1. It tests the real use case of the proposed method, wherein SARS-CoV2 must be identified amongst both human genome and other viruses. The train and test splitting was performed as previously established, and the value of  $n$  remained the same. Furthermore, the overlap was also tested at 30%, 50%, and 70%.

### 3.5. Metrics

- Confusion Matrix

The confusion matrix provides a more straightforward structure for the portrayal of the model's output, wherein the rows represent its predictions, and the columns represent the expected results. The confusion matrix layout used to display the results is illustrated in the following table, and its correct interpretation is as stated previously. Furthermore,  $n$  expresses the total number of instances, and each row, when summed, amounts to the total number of instances per class. The number of correctly classified instances can be obtained by adding all the elements in the main diagonal. On the other hand, the number of misclassified instances is obtained from the opposite diagonal.

- Accuracy

The accuracy describes the rate of correct classification of instances and is the most commonly used metric in machine learning. Considering a confusion matrix  $T = [t_{i,j}]_{n \times n}$  for a classification task with  $n$  classes, in which  $i$  denotes the index of the  $i$ -th true class and  $j$  points to the index of the class associated to the classification decision, the  $j$ -th class, the accuracy is defined as following:

$$\text{Accuracy} = \rho_v = \frac{\sum_{i=1}^n t_{i,i}}{\sum_{i=1}^n \sum_{j=1}^n t_{i,j}}. \quad (3)$$

- Kappa Coefficient

The Kappa Coefficient ( $\kappa$ ) assesses the relation between the classified instances. It is defined as:

$$\kappa = \frac{\rho_v - \rho_z}{1 - \rho_z}, \quad (4)$$

where

$$\rho_z = \frac{\sum_{i=1}^m (\sum_{j=1}^m t_{i,j}) (\sum_{j=1}^m t_{j,i})}{(\sum_{i=1}^m \sum_{j=1}^m t_{i,j})^2}. \quad (5)$$

#### 400 • Precision

Precision indicates the proportion of positive and correct classification, and is thus calculated:

$$\text{Precision} = \frac{TP}{TP + FP}, \quad (6)$$

where TP is the number of true positives and FP is the amount of false positives.

#### 405 • Recall

Recall measures the proportion of actual positives correctly classified by the model. It is computed by:

$$\text{Recall} = \frac{TP}{TP + FN}, \quad (7)$$

where FN is the number of false negatives.

#### • Sensitivity

The sensitivity, or True Positive Rate, is given by:

$$TPR = \frac{TP}{TP + FN}. \quad (8)$$

#### 410 • Specificity

The specificity, or True Negative Rate (TNR), is defined as following:

$$TNR = \frac{TN}{TN + FP}, \quad (9)$$

where TN is the number of true negatives.

- Area Under the ROC Curve

The Receiver Operating Characteristic (ROC) curve is a graph that plots the True Positive Rate (TPR) and False Positive Rate (FPR) of classification for different thresholds. The FPR is defined by:

$$FPR = \frac{FP}{FP + TN}. \quad (10)$$

Thus, the Area Under the ROC Curve (AUC) measures performance for all possible thresholds of classification in a given model, and therefore it portrays the quality of results independently of it.

## 4. Results

### 4.1. Multiclass Classification

In order to evaluate the efficiency of the proposed features extraction method, this first round of experiments was conducted in a more challenging scenario with twenty-five different viruses, including the SARS-CoV2. Five types of classifiers were tested: IBk, Multilayer Perceptron (MLP), Naive Bayes classifier (NBC), Random Forest, and Support Vector Machines (SVM). All experiments were performed with Weka software. The parameters used in each machine learning method is shown in Table 2.

Figure 6 shows the accuracy for all classifiers in the datasets with 30%, 50%, and 70% of overlap, respectively. Considering this multiclass classification, all three datasets (with 30%, 50%, and 70% overlap) presented Random Forest classifier with the highest accuracies (approximately 94% in all the datasets).

Figure 7 shows box plots for the Kappa statistic. Since Kappa statistic is less sensitive to the high imbalanced test dataset, it is a better evaluation

| Classifier                   | Hyperparameters                                                                                                                              |
|------------------------------|----------------------------------------------------------------------------------------------------------------------------------------------|
| Random Forest (RF)           | Number of estimators: 100                                                                                                                    |
| Naive Bayes Classifier (NBC) | –                                                                                                                                            |
| IBK                          | Number of neighbors to use: 1<br>Distance metric: Euclidean distance                                                                         |
| Multilayer Perceptron (MLP)  | Learning rate: 0.3<br>Momentum: 0.2<br>Single hidden layer with 48 neurons (number attributes divided by two)<br>Sigmoid activation function |
| Support Vector Machine (SVM) | C: 0.1<br>Linear Kernel                                                                                                                      |

Table 2: Classifiers parameters: SVMs with linear kernel; MLPs with 48 neurons in the hidden layer; random forests with 100 trees; and standard IBK and Bayesian networks.

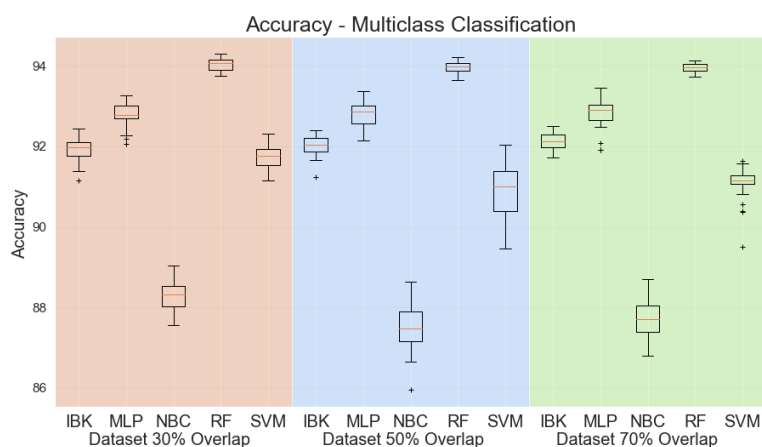

Figure 6: Accuracy for multiclass scenario.

metric then accuracy. Nevertheless, the Random Forest classifier achieves the  
435 highest Kappa statistics compared with the other classifiers (above 0.88 in all  
experiments).

Besides, accuracy and Kappa statistic, Figure 8 shows the weighted average  
sensitivity, specificity, and ROC area for all datasets and classifiers. For the  
weighted average sensitivity and ROC area, Random Forest results are higher  
440 or equal to other classifiers. For the weighted average specificity, visual analysis  
of Figure 8-b suggests that the IBK classifier achieves higher scores on this  
metric. However, all classifiers, except Naive Bayes Classifier, achieved results

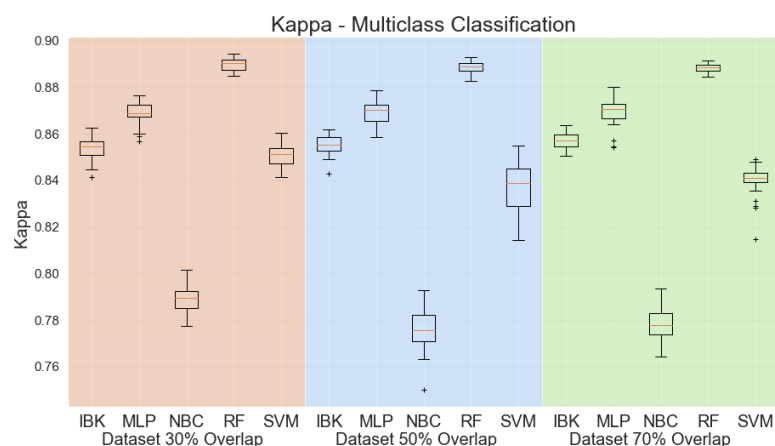

Figure 7: Kappa statistic for multiclass scenario.

above 0.99 on weighted average specificity, so the Random Forest is presented as a robust classifier for this task.

445 Aiming to evaluate the overlap percentage in the feature extraction method, Figure 9 shows box plots for accuracy, Kappa statistic, weighted average precision, recall and ROC area for the Random Forest classifier in the datasets with 30%, 50%, and 70% overlap percentages. The variance of accuracy and kappa in the dataset with 30% overlap is higher than in the 50% and 70% overlap  
450 dataset. However, 30% overlap seems to be slightly better (or at least at the same level) as the others overlap percentages.

Because of class unbalancing in the test dataset, we need to evaluate sensitivity, specificity, and ROC area for each class individually. Considering the Random Forest classifier in the dataset with 30% overlap, Table 3 shows the  
455 results of sensitivity, specificity, and ROC area individually for each virus in the database. Specificity and ROC Area results are above 0.9 for every virus. The sensitivity varies from 0.99391 for Pneumoviridae to 0.23397 for Filoriviridae. However, for most of the classes, sensitivity has values greater than 0.8 (including SARS-Cov2 class with a sensitivity of 0.82).

460 In order to perform a visual analysis of these results, Figure 10 shows the

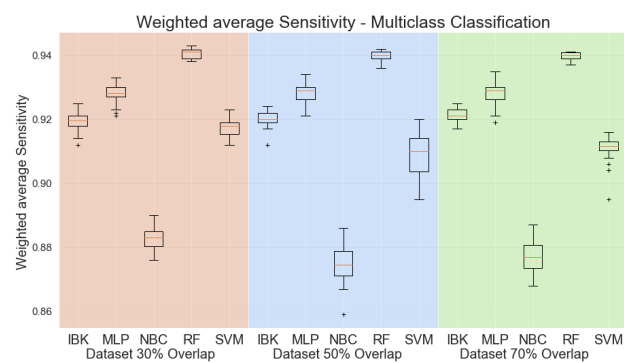

(a)

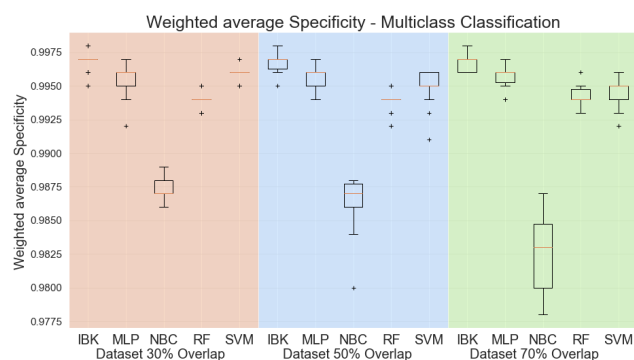

(b)

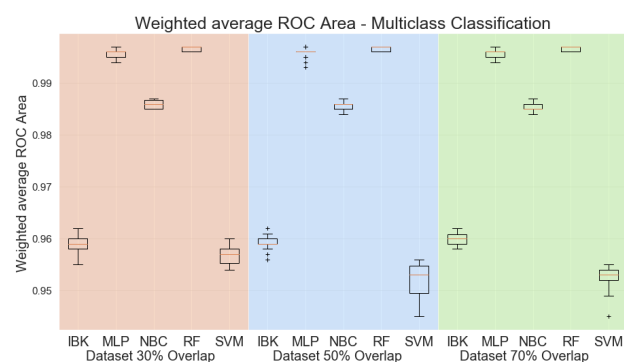

(c)

Figure 8: Weighted average sensitivity (a), specificity (b), and ROC area for Multiclass test scenario.

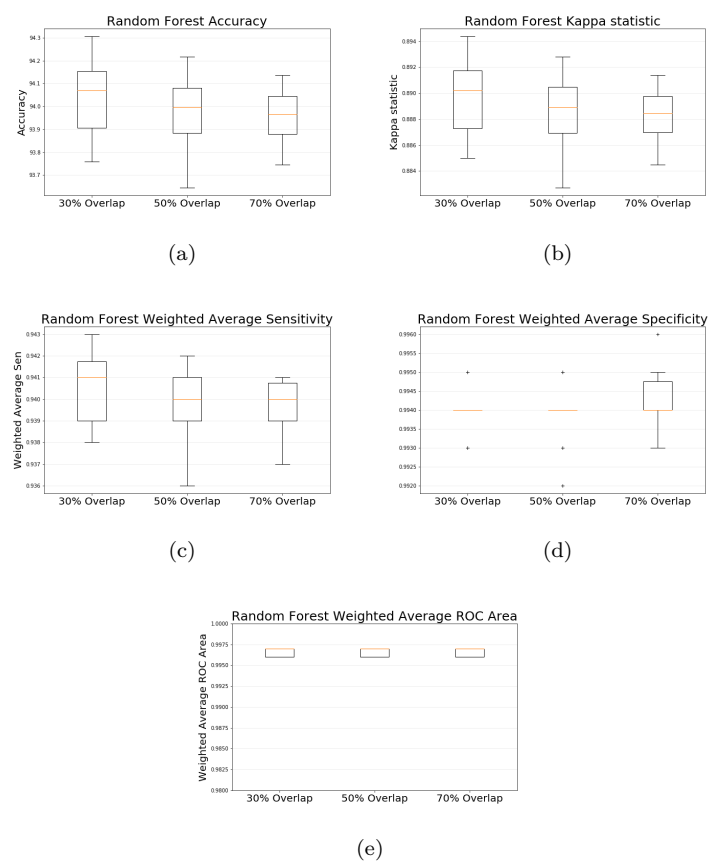

Figure 9: Random Forest accuracy (a), kappa (b), weighed average sensitivity (c), specificity (d) and ROC area (e) in 30%, 50% and 70% overlap percentages.



| Class                        | Sensitivity-Recall |                | Specificity    |                | ROC Area       |                |
|------------------------------|--------------------|----------------|----------------|----------------|----------------|----------------|
|                              | Average            | Std. Dev.      | Average        | Std. Dev.      | Average        | Std. Dev.      |
| Class 0 - Picornaviridae     | 0.46387            | 0.01407        | 0.99674        | 0.00028        | 0.99223        | 0.00163        |
| Class 1 - Arenaviridae       | 0.44609            | 0.01301        | 0.99906        | 0.00008        | 0.99773        | 0.00121        |
| Class 2 - Caliciviridae      | 0.98755            | 0.00392        | 0.99886        | 0.00045        | 0.99893        | 0.00089        |
| Class 3 - Pneumoviridae      | 0.99391            | 0.00285        | 0.99999        | 0.00001        | 0.99993        | 0.00025        |
| Class 4 - Phenuiviridae      | 0.94210            | 0.00704        | 0.99966        | 0.00005        | 0.99840        | 0.00076        |
| Class 5 - Togaviridae        | 0.99159            | 0.00327        | 0.99958        | 0.00016        | 0.99950        | 0.00067        |
| Class 6 - Poxviridae         | 0.99314            | 0.00662        | 0.99994        | 0.00003        | 0.99947        | 0.00191        |
| Class 7 - Filoviridae        | 0.23397            | 0.03284        | 0.99950        | 0.00005        | 0.99877        | 0.00096        |
| Class 8 - Flaviridae         | 0.55250            | 0.00768        | 0.98242        | 0.00144        | 0.95860        | 0.00308        |
| Class 9 - Hantaviridae       | 0.98284            | 0.00565        | 0.99960        | 0.00004        | 0.99907        | 0.00100        |
| Class 10 - Lassa virus       | 0.59120            | 0.03118        | 0.99778        | 0.00006        | 0.99707        | 0.00112        |
| Class 11 - Dengue            | 0.87925            | 0.01729        | 0.98384        | 0.00029        | 0.98910        | 0.00070        |
| Class 12 - Hepeviridae       | 0.98924            | 0.00711        | 0.99972        | 0.00014        | 0.99933        | 0.00083        |
| Class 13 - Ebola virus       | 0.39652            | 0.05417        | 0.99913        | 0.00004        | 0.99833        | 0.00094        |
| Class 14 - Enterovirus       | 0.70652            | 0.02068        | 0.99144        | 0.00021        | 0.99313        | 0.00034        |
| Class 15 - Zika virus        | 0.96675            | 0.01076        | 0.99728        | 0.00002        | 0.99800        | 0.00000        |
| Class 16 - Nairoviridae      | 0.98687            | 0.00686        | 0.99974        | 0.00008        | 0.99843        | 0.00238        |
| Class 17 - Coronaviridae     | 0.96194            | 0.00181        | 0.99988        | 0.00005        | 0.99833        | 0.00119        |
| Class 18 - Paramyxoviridae   | 0.98781            | 0.00274        | 0.99982        | 0.00006        | 0.99970        | 0.00078        |
| Class 19 - Rhabdoviridae     | 0.97468            | 0.00541        | 0.99976        | 0.00009        | 0.99967        | 0.00047        |
| Class 20 - Hepatitis C virus | 0.97425            | 0.00244        | 0.99288        | 0.00074        | 0.99823        | 0.00062        |
| Class 21 - Peribunyaviridae  | 0.95344            | 0.00603        | 0.99870        | 0.00046        | 0.99523        | 0.00138        |
| Class 22 - Reoviridae        | 0.98059            | 0.00261        | 0.99923        | 0.00014        | 0.99963        | 0.00048        |
| Class 23 - Phasma Viridae    | 0.29167            | 0.10704        | 0.99999        | 0.00000        | 0.99000        | 0.01464        |
| <b>Class 24 - SARS-Cov2</b>  | <b>0.82222</b>     | <b>0.05613</b> | <b>0.99974</b> | <b>0.00001</b> | <b>0.99883</b> | <b>0.00250</b> |

Table 3: Random Forest sensitivity, specificity, and ROC area for every single class (results from dataset with 30% overlap).

average confusion matrix for the Random Forest classifier in the dataset with 30% overlap. The confusion matrix is expressed in terms of percentage for the particular class, and the classes indexes numbers are the same as shown in Table 3. We can see that for some classes, there is a confusion with another virus. For example, most of the Picornaviridae virus (index 0) is classified as Enterovirus (index 14). This confusion is not symmetrical: Picornaviridae is misclassified as Enterovirus, but Enterovirus is not misclassified as Picornaviridae. The only exception for this observation of confusion with another virus type is the Phasma Viridae (index 23), which is confused with two other viruses: Hantaviridae (index 9), and Peribunyaviridae (index 21). However, since there are few examples of Phasma Viridae in the dataset (only 42 examples), those results may be

caused by the low representative of this class in the dataset.

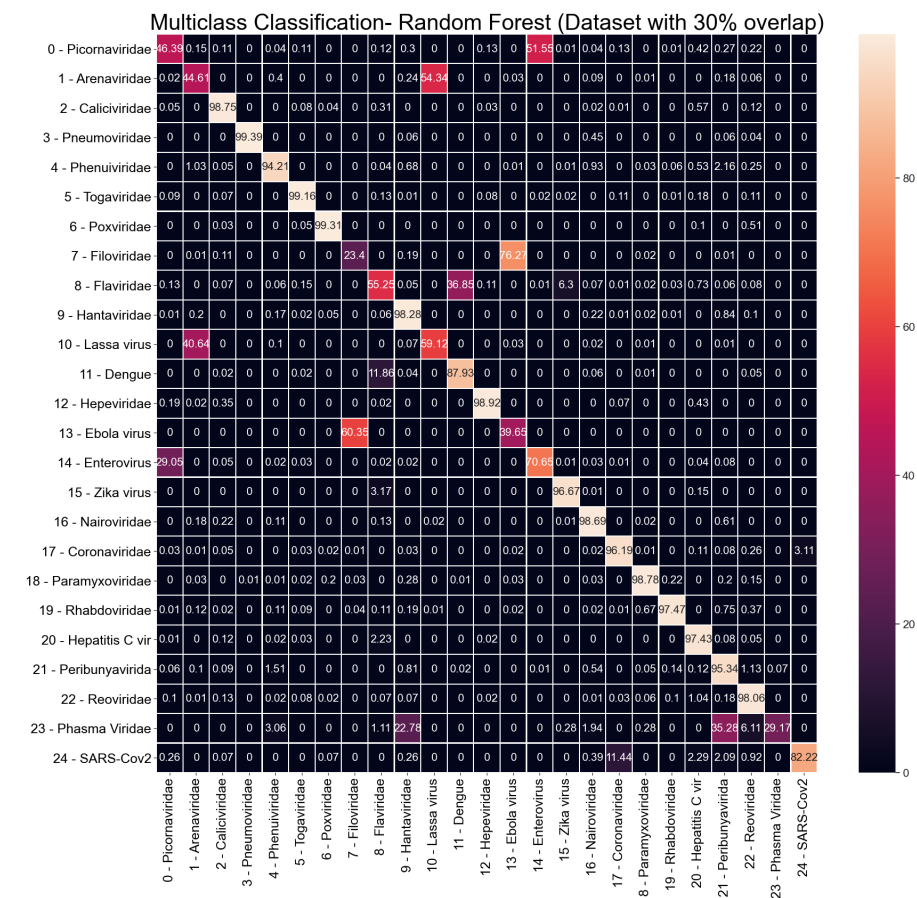

Figure 10: Random Forest average Confusion Matrix (results from dataset with 30% overlap).

Regarding the SARS-Cov2 virus (index 24), the only relevant confusion is with Coronaviridae (index 17). It is a predictable outcome since SARS-Cov2 belongs to the Coronaviridae virus family. 3.1% of Coronaviridae examples are classified as SARS-Cov2 (the only confusion noticed in column 24 of the confusion matrix). A more significant confusion is noticed between SARS-Cov2 and Coronaviridae since 11% of SARS-Cov2 are misclassified as Coronaviridae.

Since the ROC area for SARS-Cov2 is 0.99883 (Table 3), we performed a threshold adjustment for SARS-Cov2 class in order to reach 100% sensitivity. The new average confusion matrix is shown in Figure 11. Higher false positives

for SARS-Cov2 remains from Coronaviridae (5,1% - index 17). In the sequence of false positive rates, we have: Hepatitis C virus (3,47% - index 20), Reoviridae (3,19% - index 22), and Phasma Viridae (2,68% index 23).

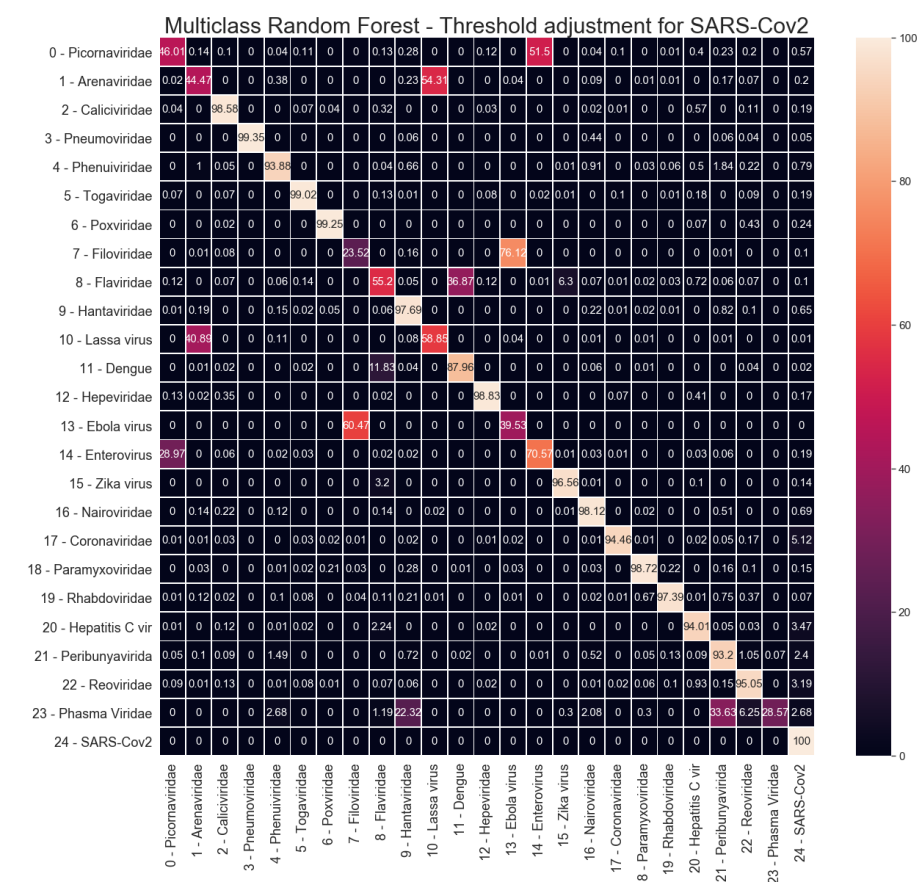

Figure 11: Random Forest average Confusion Matrix with threshold adjustment for 100% sensitivity on SARS-Cov2 (index 24).

#### 4.2. Binary Classification

Given that, in the multiclass scenario, the highest false positives for SARS-Cov2 are from Coronaviridae, we evaluated the same classifiers used in the multiclass scenario for a binary classification between Coronavirus and SARS-Cov2. For this experiment, only the dataset with 30% overlap was used, since

490 this overlap percentage has shown to represent the virus genome sequences satisfactorily.

Figure 12 shows the accuracy, kappa statistic, weighted average sensitivity, specificity, and ROC area for each classifier. It is important to state that there is still a relevant imbalance between the number of Coronaviridae and SARS-Cov2  
495 examples in the dataset (3256 and 171, respectively). So, the Kappa statistic is still more appropriate than accuracy to assess the classifier's overall performance. Regarding Kappa statistics, weighted average specificity, and ROC area, MLP results are higher or equal to other classifiers. For the weighted average sensitivity, SVM achieves higher results than MLP. Nevertheless, given that average sensitivity for MLP is higher than 0.96 and MLP overcomes SVM in all  
500 other metrics, MLP seems to be a more robust classifier for this particular task.

Table 4 shows the sensitivity, specificity and ROC Area for each class. It is possible to notice that each one of those metrics has values above 0.96. Figure 13 shows the average Confusion Matrix for MLP classifier. There was no relevant  
505 difference with the multiclass scenario regarding the confusion between Coronaviridae and SARS-Cov2 since there is still a 3.85% of Coronaviridae examples misclassified as SARS-Cov2. However, about the confusion between SARS-Cov2 and Coronaviridae, the binary MLP classifier achieved 2.61% of confusion while 11% in the multiclass scenario.

| Class                       | Sensitivity-Recall |                | Specificity    |                | ROC Area       |                |
|-----------------------------|--------------------|----------------|----------------|----------------|----------------|----------------|
|                             | Average            | Std. Dev.      | Average        | Std. Dev.      | Average        | Std. Dev.      |
| Class 17 - Coronaviridae    | 0.96151            | 0.00246        | 0.97386        | 0.03052        | 0.97353        | 0.01863        |
| <b>Class 24 - SARS-Cov2</b> | <b>0.97386</b>     | <b>0.03052</b> | <b>0.96151</b> | <b>0.00246</b> | <b>0.97353</b> | <b>0.01863</b> |

Table 4: Results of Sensitivity, specificity, and ROC area for MLP binary classifier (Coronaviridae vs. SARS-Cov2 using the 30% overlap dataset).

### 510 4.3. Viruses with similar symptoms

In this experiment, viruses were selected due to similar symptoms. The dataset was arranged into four classes: SARS-Cov2, Coronaviridae, Paramyx-

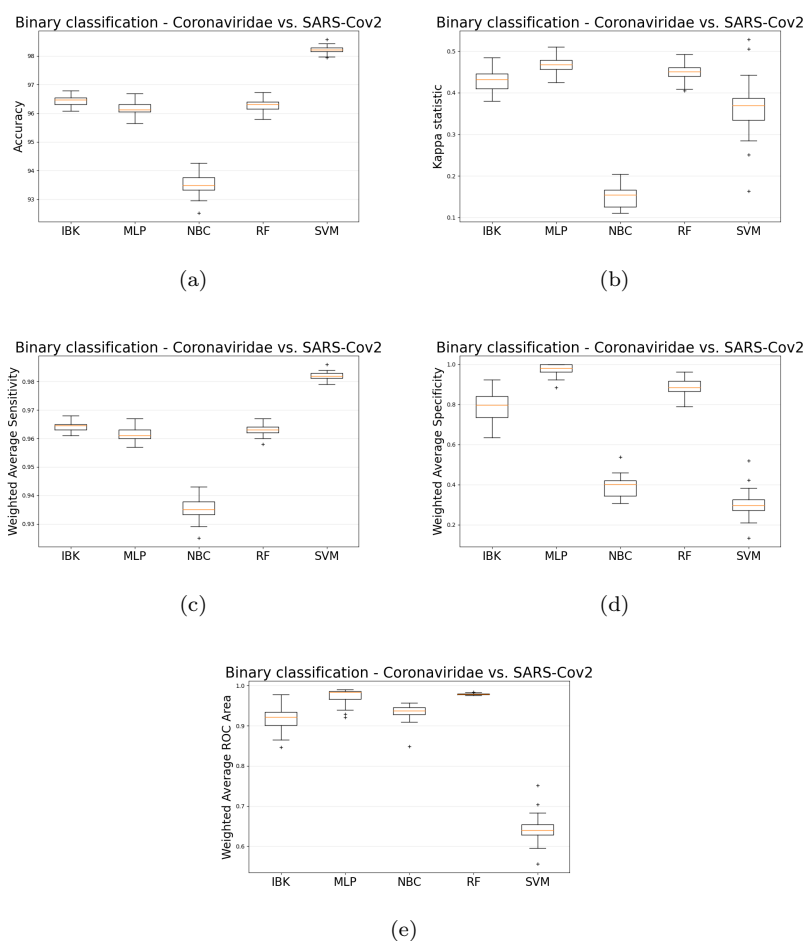

Figure 12: Binary classification (Coronaviridae vs. SARS-Cov2 using the 30% overlap dataset) accuracy (a), kappa (b), weighed average sensitivity (c), specificity (d), and ROC area (e).

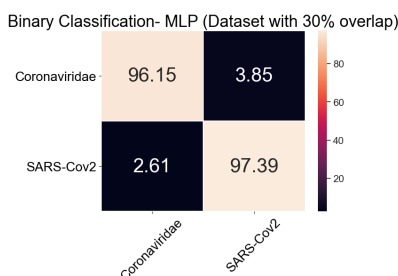

Figure 13: MLP average Confusion Matrix for binary classification task (Coronaviridae vs. SARS-Cov2 using the 30% overlap dataset).

oviridae, and Miscellaneous. The Miscellaneous Class is a compound of Peneu-  
 moviridae, Hantaviridae, Enterovirus, and Nairoviridae. Then, the same classi-  
 515 fiers used previously were evaluated in this classification task.

Figures 14 and 15 shows the accuracy and kappa for all classifiers and  
 datasets in this classification task. Except for the Naive Bayesian classifier,  
 classifiers have similar performance metrics, with approximately 97% accuracy  
 and kappa equal to 0.96. Figure 16 shows the weighted average specificity  
 520 and sensitivity and ROC are. The weighted average sensitivity and specificity  
 look very similar to all classifiers (except Naive Bayes Classifier). However, the  
 weighted average ROC area for MLP and Random Forest classifiers is slightly  
 higher than the other classifiers, although IBK and SVM classifiers also achieve  
 a weighted average ROC area above 0.98 in all datasets.

525 In order to better evaluate the MLP and Random Classifier, Figure 17 shows  
 the confusion matrices for those classifiers in all datasets. The Random Forest  
 presents a confusion between the SARS-Cov2 and the Coronaviridae of approx-  
 imately 10%. It is very similar to the achieved results in the multiclass scenario.  
 However, the MLP classifier achieves significantly low-level confusions between  
 530 SARS-Cov2 and Coronaviridae (1.57% in the datasets with 30% and 50% over-  
 lap). The main confusion found in the MLP classifier is between Conronarividae  
 and SARS-Cov2 (3.81% for the dataset with 30% overlap). By MLP confusion  
 matrix analysis is not possible to find significant differences between the 30%,  
 50%, or 70% overlap percentages. Since the 30% overlap requires less compu-

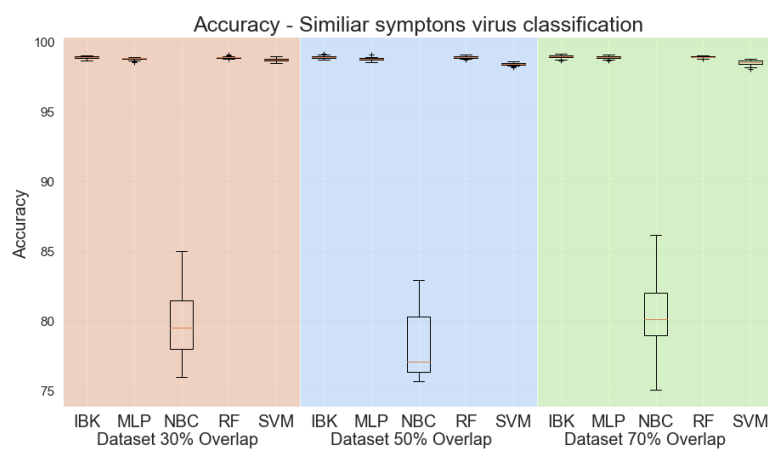

Figure 14: Accuracy for similar symptoms scenario.

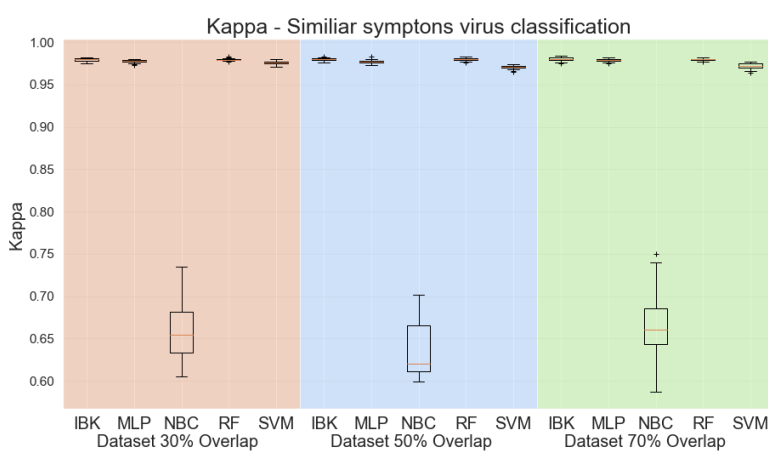

Figure 15: Kappa Statistic for similar symptoms scenario.

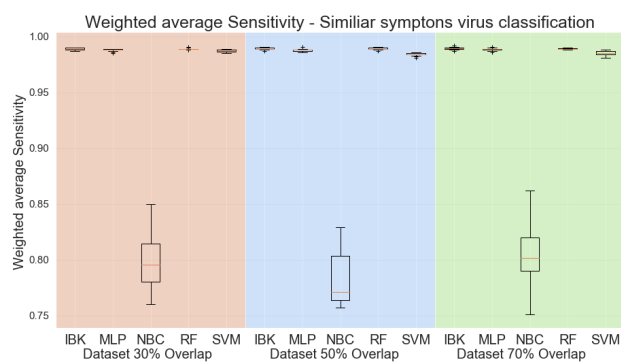

(a)

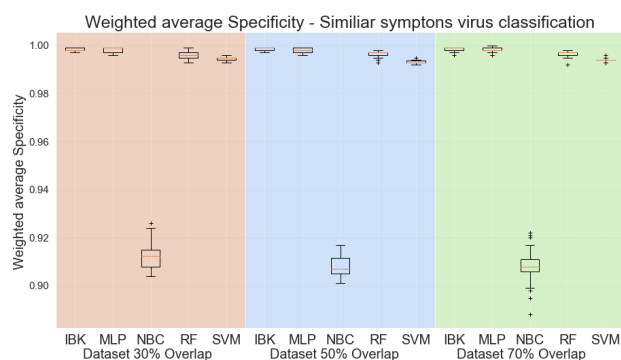

(b)

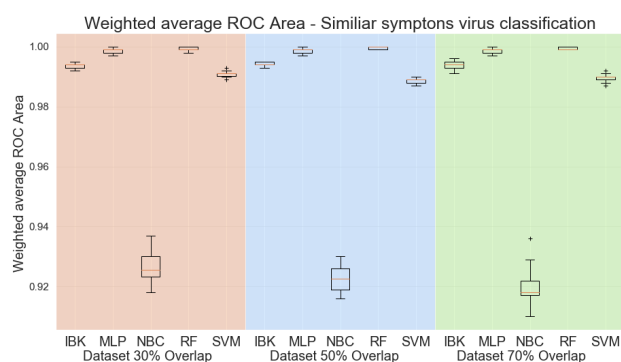

(c)

Figure 16: Weighted average sensitivity (a), specificity (b), and ROC area for Similar symptoms viruses test scenario.



tational effort to extract the features, we can select the MLP classifier with a 30% overlap dataset as a better approach to this particular task. The Table 5 shows the sensitivity, specificity and ROC area for each class. The average ROC Area and specificity are above 0.99 for all classes. The average sensitivity is also above 0.99 for the Paramyxoviridae and Miscellaneous classes. The low-  
ers sensitivity is for Coronaviridae (0.959), while a slightly higher sensitivity is achieved for SARS-Cov2 (0.97).

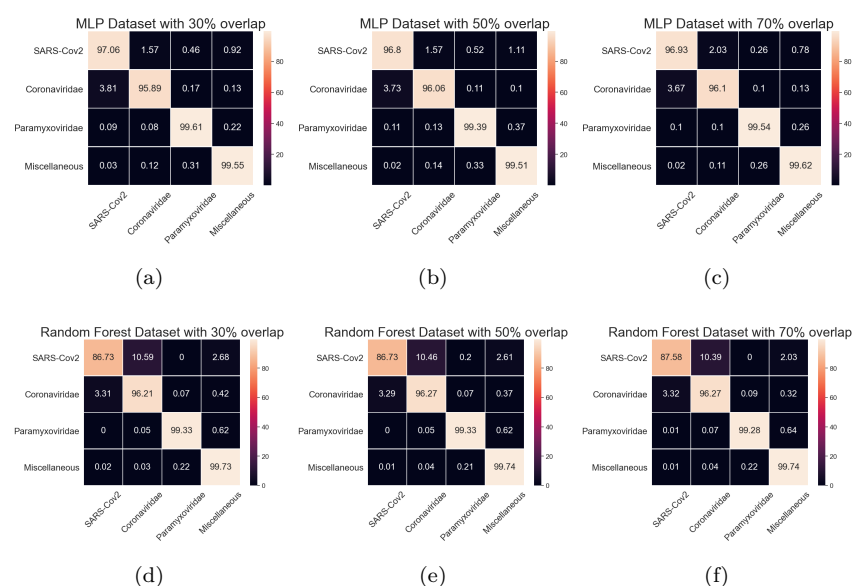

Figure 17: Average Confusion matrices for MLP and Random Forest in the Similar symptoms viruses test scenario.

#### 4.4. Real test scenario

In this scenario, the SARS-Cov2 test is designed as a three-class classification problem: SARS-Cov2 (the test target), GRCh38 (the healthy human reference),  
and Coronaviridae (a virus control sample). The same classifiers used in the other  
experiments were applied to this new task.

Figure 18 shows the accuracy and Figure 19 shows the kappa statistic results. Except for the Naive Bayes Classifier, all other classifiers have accuracy above

| Class            | Sensitivity-Recall |                | Specificity    |                | ROC Area       |                |
|------------------|--------------------|----------------|----------------|----------------|----------------|----------------|
|                  | Average            | Std. Dev.      | Average        | Std. Dev.      | Average        | Std. Dev.      |
| <b>SARS-Cov2</b> | <b>0.97059</b>     | <b>0.03387</b> | <b>0.99187</b> | <b>0.00046</b> | <b>0.99583</b> | <b>0.00481</b> |
| Coronaviridae    | 0.95891            | 0.00249        | 0.99882        | 0.00069        | 0.99687        | 0.00076        |
| Paramyxoviridae  | 0.99611            | 0.00430        | 0.99726        | 0.00104        | 0.99863        | 0.00244        |
| Miscellaneous*   | 0.99548            | 0.00151        | 0.99827        | 0.00153        | 0.99943        | 0.00072        |

\*Miscellaneous class includes four virus types: Pneumoviridae, Hantaviridae, Enterovirus, and Nairoviridae

Table 5: Results of Sensitivity, specificity, and ROC area for MLP classifier in the similar symptoms viruses test scenario (results from dataset with 30% overlap).

99% kappa above 0.9. By these metrics, It is not possible to distinguish the best classifier. The same behavior is observed in the weighted average metrics shown in Figure 20. Weighted average sensitivity, specificity, and ROC area are higher than 0.99 for all classifiers except the Naive Bayes Classifier.

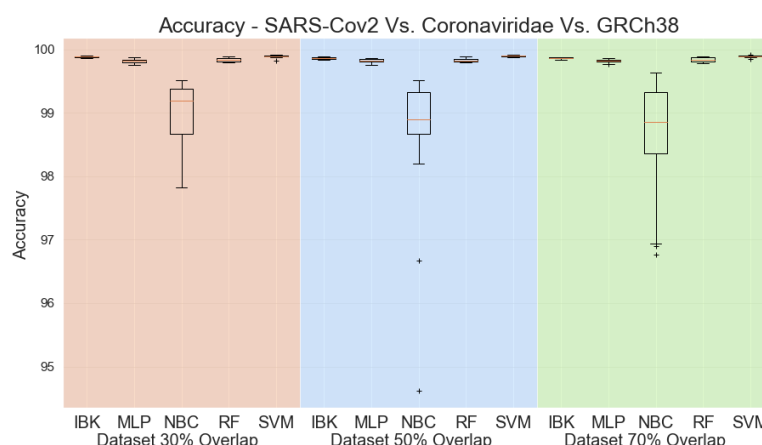

Figure 18: Accuracy for SARS-Cov2 test scenario.

Aiming to better evaluate the results of the classifiers in the SARS-Cov2 test task, all the confusion matrices for IBK, MLP, Random Forest, and SVM classifiers are shown in Figure 21. IBK and Random Forest classifiers presents a confusion between SARS-Cov2 and Coronaviridae that varies from 10.26% (Figure 21-h) to 14.77% (Figure 21-c). This outcome is even worse for SVM

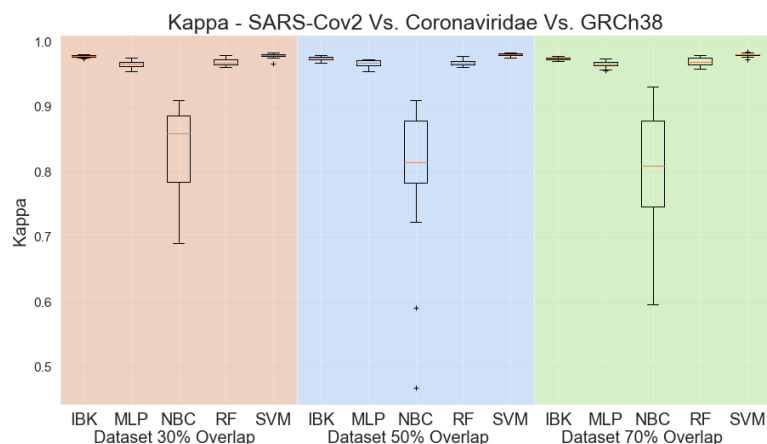

Figure 19: Kappa Statistic for SARS-Cov2 test scenario.

classifier since most of the SARS-Cov2 examples are misclassified as Coronaviridae. By confusion matrix analysis, The MLP classifier has lower confusion rates  
 560 between SARS-Cov2 and Coronaviridae. The results from MLP classifier in the dataset with 50% overlap (Figure 21-e) shows 99.92% average true positive rate for GRCh38 class, and 98.82% for the SARS-Cov2. For the Coronaviridae class, this classifier achieves 96.2%, while only 3.73% of Coronaviridae examples are misclassified as SARS-Cov2. Table 6 shows the sensitivity, specificity and ROC  
 565 Area for each of the classes for this MLP classifier.

| Class            | Sensitivity-Recall |                | Specificity    |                | ROC Area       |                |
|------------------|--------------------|----------------|----------------|----------------|----------------|----------------|
|                  | Average            | Std. Dev.      | Average        | Std. Dev.      | Average        | Std. Dev.      |
| <b>SARS-Cov2</b> | <b>0.98824</b>     | <b>0.01198</b> | <b>0.99860</b> | <b>0.00020</b> | <b>0.99947</b> | <b>0.00056</b> |
| Coronaviridae    | 0.96196            | 0.00190        | 0.99967        | 0.00017        | 0.99810        | 0.00094        |
| GRCh38           | 0.99923            | 0.00028        | 0.99928        | 0.00094        | 0.99997        | 0.00018        |

Table 6: Results of Sensitivity, specificity, and ROC area for MLP classifier in the SARS-Cov2 test scenario (results from dataset with 50% overlap).

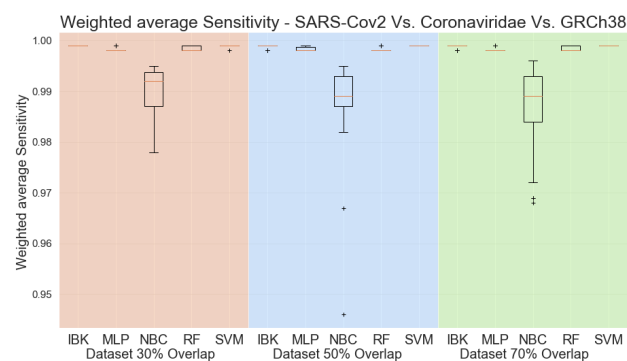

(a)

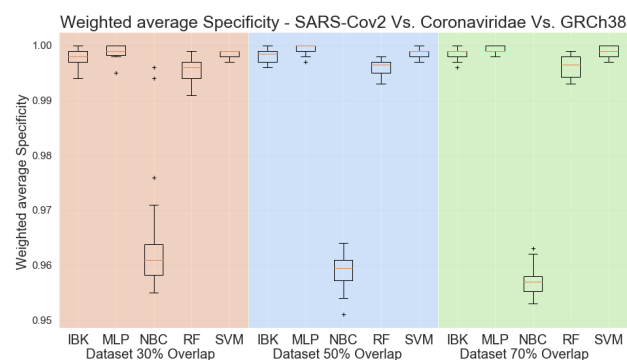

(b)

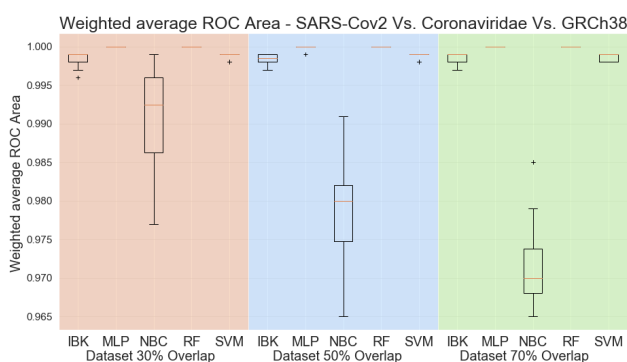

(c)

Figure 20: Weighted average sensitivity (a), specificity (b), and ROC area for SARS-Cov2 test scenario.

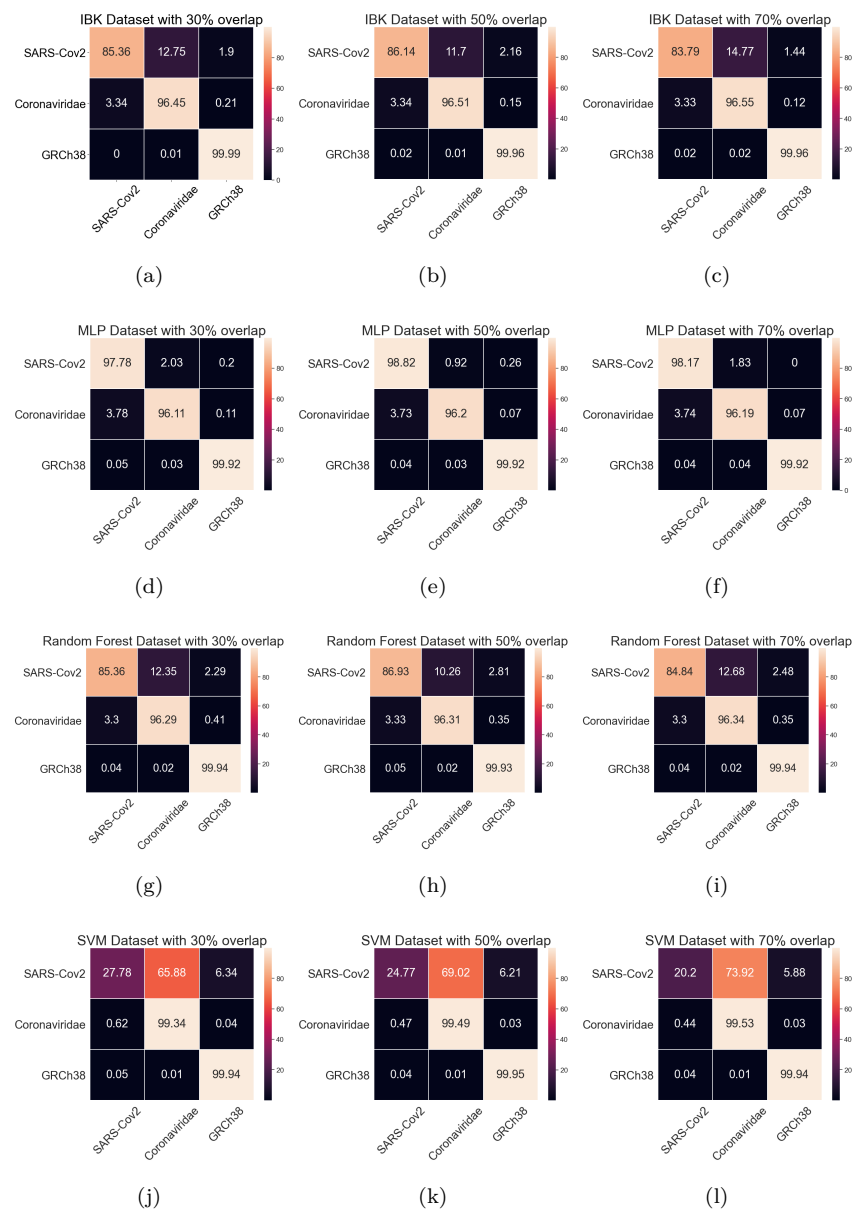

Figure 21: Average Confusion matrices for IBK, MLP, Random Forest and SMV in the SARS-Cov2 test scenario.

## 5. Discussion

Regarding the feature extraction methods, it seems to capture the structure of the viruses' genome sequence. Random Forest classifier achieved the best overall performance for multiclass scenarios, while MLP classifier presented the best results for scenarios with fewer classes.

Evaluating the parameters for the feature extraction proposed method, splitting the viruses' genome sequence into four folders ( $n = 4$ ) seems to be enough to produce representative features. Regarding the overlap percentage, the proposed feature extraction method is not very sensitive to this parameter, even though 30% to 50% seems to be enough to produce good features representations.

The first multiclass scenario (with 25 viruses classes) is an extreme case scenario. Nevertheless, the Random Forest classifier achieved sensitivity and specificity above 0.9 for many classes. For those classes with lower sensitivity, the confusion matrix shows that most confusions are particular between two viruses. For example, Filoriviridae is the class with a lower sensitivity rate (0.23). However, checking the confusion matrix, on average, 76.27% of Filoriviridae are misclassified as Ebola Virus. There is no other significant confusion for Filoriviridae, so it is possible to design a classifier cascade to solve this specific confusion between two viruses.

One particular virus class is the Pharma Viridae since it has only 42 samples in the dataset (30 used for training and 12 for testing). Even with this small amount of samples in the multiclass scenario, the significant misclassifications for Pharma Viridae are Henteraviridae (22.78%), and Peribunyavirida (35.26%). With a larger sample size for the Pharma Viridae, classifiers could find a better boundary decision reducing this level of false-negative rate. However, for this particular class, three-classes cascade classifiers could be evaluated to deal with these types of errors.

Regardless of the feature extraction parameters or even the used classifier, there is still a 3-4% of Coronaviridae samples misclassified as SARS-Cov2. How-

ever, this is an expected outcome, since SARS-Cov2 belongs to the Coronaviridae family. Visualizing the extracted features, we found some samples of SARS-Cov2 and Coronaviridae that can not be distinguished, as showed in Figure 22. So, it is tough for any classifier to separate those two classes optimally.

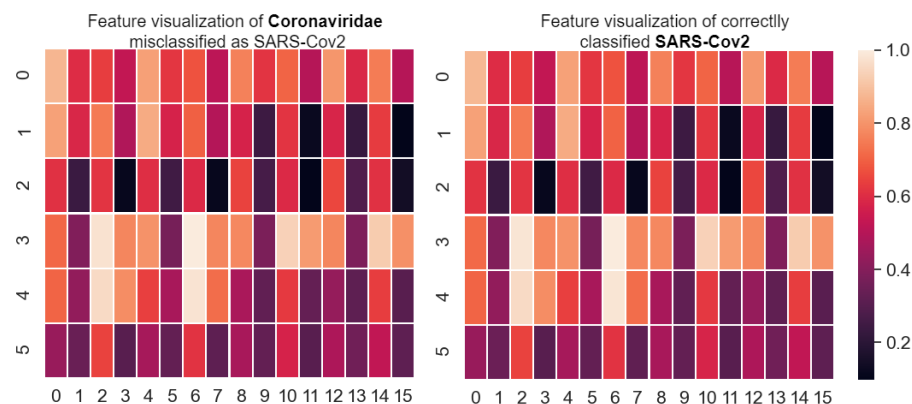

Figure 22: Feature visualization for selected SARS-Cov2 and Coronaviridae sample.

## 600 6. Conclusion

In this work we presented a novel method to represent DNA sequences by using pseudo-convolutions and co-occurrence matrices. With this method, we were able to represent hundreds of thousands of DNA sequences from 24 virus families. Then we separated SARS-Cov-2 sequences from the Coronaviridae family and demonstrated that our model is able to differentiate all virus families present on our database. SARS-Cov-2 was discriminated from virus families other than Coronaviridae and even from other coronaviruses with very high sensitivity and specificity.

We aimed to show the capabilities of optimizing the molecular diagnosis of Covid-19 by combining RT-PCR, the actual ground-truth Covid-19 diagnostic method, and our pseudo-convolutional method to identify SARS-Cov-2 DNA sequences faster.

From the obtained results, we can assume that the proposed pseudo-convolutional approach is able to characterize SARS-Cov-2 DNA sequences. This new

615 representation of DNA sequences can be successfully used as a feature extraction stage to full connected networks, in order to use the deep learning philosophy, or other classical classification architectures. The evaluation of the proposed approach in real test scenarios, necessarily reduced to a limited set of virus families and healthy human sample DNA, showed high sensitivity (higher than 620 0.988) and specificity (higher than 0.998) rate as well. Hence, other researchers can use our solution and our methods to improve their results to diagnose Covid-19 faster with accuracies even higher than the state-of-the-art methods.

## Acknowledgements

We are grateful to the Brazilian research-funding agency CNPq, for the 625 partial support of this research.

## Conflict of Interest

All authors declare they have no conflicts of interest.

## Compliance with Ethical Standards

This study was partially funded by the Brazilian research agency Conselho 630 Nacional de Desenvolvimento Científico e Tecnológico, CNPq.

All procedures performed in studies involving human participants were in accordance with the ethical standards of the institutional and/or national research committee and with the 1964 Helsinki declaration and its later amendments or comparable ethical standards.

## References

Ai, J.-W., Zhang, Y., Zhang, H.-C., Xu, T., & Zhang, W.-H. (2020). Era of molecular diagnosis for pathogen identification of unexplained pneumonia, lessons to be learned. *Emerging Microbes & Infections*, 9, 597–600.



- Altman, N. S. (1992). An introduction to kernel and nearest-neighbor nonpara-  
640 metric regression. *The American Statistician*, 46, 175–85.
- Apostolopoulos, I., Aznaouridis, S., & Tzani, M. (2020). Extracting possibly representative COVID-19 biomarkers from x-ray images with deep learning approach and image data related to pulmonary diseases. *arXiv preprint arXiv:2004.00338*, 2020.
- 645 Apostolopoulos, I. D., & Mpesiana, T. A. (2020). Covid-19: automatic detection from x-ray images utilizing transfer learning with convolutional neural networks. *Physical and Engineering Sciences in Medicine*, 2020, 1.
- Barbosa, V. A. d. F., Gomes, J. C., de Santana, M. A., Albuquerque, J. E. d. A., de Souza, R. G., de Souza, R. E., & dos Santos, W. P. (2020). Heg.ia:  
650 An intelligent system to support diagnosis of covid-19 based on blood tests. *medRxiv*, 2020.
- Bosco, G. L., & Di Gangi, M. A. (2016). Deep learning architectures for dna sequence classification. In *International Workshop on Fuzzy Logic and Applications* (pp. 162–71). Springer.
- 655 Bruning, A. H., Leeflang, M. M., Vos, J. M., Spijker, R., de Jong, M. D., Wolthers, K. C., & Pajkrt, D. (2017). Rapid tests for influenza, respiratory syncytial virus, and other respiratory viruses: a systematic review and meta-analysis. *Clinical Infectious Diseases*, 65, 1026–32.
- Burog, A. I. L. D., Yacapin, C. P. R. C., Maglente, R. R. O., Macalalad-Josue, A. A., & Uy, E. J. B. (2020). Should IgM/IgG rapid test kit be used in the  
660 diagnosis of COVID-19? *Asia Pacific Center for Evidence Based Healthcare*, 2020, 1–12.
- Casella, M., Rajnik, M., Cuomo, A., Dulebohn, S. C., & Di Napoli, R. (2020). Features, evaluation and treatment coronavirus (covid-19). In *StatPearls [Internet]*. StatPearls Publishing.
- 665

- Cassaniti, I., Novazzi, F., Giardina, F., Salinaro, F., Sachs, M., Perlini, S., Bruno, R., Mojoli, F., Baldanti, F. et al. (2020). Performance of vivadiag COVID-19 IgM/IgG rapid test is inadequate for diagnosis of COVID-19 in acute patients referring to emergency room department. *Journal of medical virology*, 2020.
- 670 Chan, J. F.-W., Yip, C. C.-Y., To, K. K.-W., Tang, T. H.-C., Wong, S. C.-Y., Leung, K.-H., Fung, A. Y.-F., Ng, A. C.-K., Zou, Z., Tsoi, H.-W. et al. (2020). Improved molecular diagnosis of COVID-19 by the novel, highly sensitive and specific COVID-19-RdRp/Hel real-time reverse transcription-PCR assay validated in vitro and with clinical specimens. *Journal of Clinical Microbiology*, 58.
- 675 Chan, P. K., To, W.-K., Ng, K.-C., Lam, R. K., Ng, T.-K., Chan, R. C., Wu, A., Yu, W.-C., Lee, N., Hui, D. S. et al. (2004). Laboratory diagnosis of sars. *Emerging Infectious Diseases*, 10, 825.
- 680 Chawla, N. V., Bowyer, K. W., Hall, L. O., & Kegelmeyer, W. P. (2002). SMOTE: synthetic minority over-sampling technique. *Journal of Artificial Intelligence Research*, 16, 321–57.
- Chu, D. K., Pan, Y., Cheng, S. M., Hui, K. P., Krishnan, P., Liu, Y., Ng, D. Y., Wan, C. K., Yang, P., Wang, Q. et al. (2020). Molecular diagnosis of a novel coronavirus (2019-nCoV) causing an outbreak of pneumonia. *Clinical Chemistry*, 66, 549–55.
- 685 Cleemput, S., Dumon, W., Fonseca, V., Abdool Karim, W., Giovanetti, M., Alcantara, L. C., Deforche, K., & de Oliveira, T. (2020). Genome Detective Coronavirus Typing Tool for rapid identification and characterization of novel coronavirus genomes. *Bioinformatics*, .
- 690 Consortium, G. R. (2013). *Genome Reference Consortium Human Build 38*. grc. URL: [https://www.ncbi.nlm.nih.gov/assembly/GCF\\_000001405.26/](https://www.ncbi.nlm.nih.gov/assembly/GCF_000001405.26/) last accessed: 2020 may 25.

- Corman, V., Bleicker, T., Brünink, S., Drosten, C., & Zambon, M. (2020a).  
695 Diagnostic detection of 2019-nCoV by real-time RT-PCR. *World Health Organization, Jan, 17*.
- Corman, V., Eckerle, I., Bleicker, T., Zaki, A., Landt, O., Eschbach-Bludau, M., van Boheemen, S., Gopal, R., Ballhause, M., Bestebroer, T. et al. (2012).  
700 Detection of a novel human coronavirus by real-time reverse-transcription polymerase chain reaction. *Eurosurveillance, 17*.
- Corman, V. M., Landt, O., Kaiser, M., Molenkamp, R., Meijer, A., Chu, D. K., Bleicker, T., Brünink, S., Schneider, J., Schmidt, M. L. et al. (2020b). Detection of 2019 novel coronavirus (2019-nCoV) by real-time RT-PCR. *Eurosurveillance, 25*, 2000045.
- 705 Cortes, C., & Vapnik, V. (1995). Support-vector networks. In *Machine Learning* (pp. 273–97).
- Döhla, M., Boesecke, C., Schulte, B., Diegmann, C., Sib, E., Richter, E., Eschbach-Bludau, M., Aldabbagh, S., Marx, B., Eis-Hübinger, A.-M. et al. (2020). Rapid point-of-care testing for SARS-CoV-2 in a community screening  
710 setting shows low sensitivity. *Public Health, 182*, 170–2.
- Emery, S. L., Erdman, D. D., Bowen, M. D., Newton, B. R., Winchell, J. M., Meyer, R. F., Tong, S., Cook, B. T., Holloway, B. P., McCaustland, K. A. et al. (2004). Real-time reverse transcription–polymerase chain reaction assay for SARS-associated coronavirus. *Emerging infectious diseases, 10*, 311.
- 715 Gomes, J. C., Barbosa, V. A. d. F., de Santana, M. A., Bandeira, J., Valenca, M. J. S., de Souza, R. E., Ismael, A. M., & dos Santos, W. P. (2020). Ikonos: An intelligent tool to support diagnosis of covid-19 by texture analysis of x-ray images. *medRxiv, 2020*.
- Hellewell, J., Abbott, S., Gimma, A., Bosse, N. I., Jarvis, C. I., Russell, T. W.,  
720 Munday, J. D., Kucharski, A. J., Edmunds, W. J., Sun, F. et al. (2020). Fea-

sibility of controlling COVID-19 outbreaks by isolation of cases and contacts.  
*The Lancet Global Health*, .

Kraemer, M. U., Yang, C.-H., Gutierrez, B., Wu, C.-H., Klein, B., Pigott, D. M.,  
 du Plessis, L., Faria, N. R., Li, R., Hanage, W. P. et al. (2020). The effect of  
 725 human mobility and control measures on the COVID-19 epidemic in China.  
*Science*, 368, 493–7.

Li, Z., Yi, Y., Luo, X., Xiong, N., Liu, Y., Li, S., Sun, R., Wang, Y., Hu, B.,  
 Chen, W. et al. (2020). Development and clinical application of a rapid IgM-  
 IgG combined antibody test for SARS-CoV-2 infection diagnosis. *Journal of*  
 730 *Medical Virology*, .

Liu, Y., Liu, Y., Diao, B., Ren, F., Wang, Y., Ding, J., & Huang, Q. (2020).  
 Diagnostic indexes of a rapid IgG/IgM combined antibody test for SARS-  
 CoV-2. *medRxiv*, 2020.

Long, Q.-X., Liu, B.-Z., Deng, H.-J., Wu, G.-C., Deng, K., Chen, Y.-K., Liao,  
 735 P., Qiu, J.-F., Lin, Y., Cai, X.-F. et al. (2020). Antibody responses to SARS-  
 CoV-2 in patients with COVID-19. *Nature Medicine*, 2020, 1–4.

Lusa, L. et al. (2013). Smote for high-dimensional class-imbalanced data. *BMC*  
*bioinformatics*, 14, 106.

Maron, M. E. (1961). Automatic indexing: An experimental inquiry. *J. ACM*,  
 740 8, 404–17.

Minsky, M., & Papert, S. (1969). *Perceptrons: An Introduction to Computa-*  
*tional Geometry*. Cambridge, MA, USA: MIT Press.

Nao, N., Shirato, K., Katano, H., Matsuyama, S., & Takeda, M. (2020). Detec-  
 tion of second case of 2019-ncov infection in japan (corrected version).

745 Narin, A., Kaya, C., & Pamuk, Z. (2020). Automatic detection of coronavirus  
 disease (COVID-19) using x-ray images and deep convolutional neural net-  
 works. *arXiv preprint arXiv:2003.10849*, .

- Pan, Y., Li, X., Yang, G., Fan, J., Tang, Y., Zhao, J., Long, X., Guo, S., Zhao, Z., Liu, Y. et al. (2020). Serological immunochromatographic approach in diagnosis with SARS-CoV-2 infected COVID-19 patients. *Journal of Infection*, 750
- Patel, R., Babady, E., Theel, E. S., Storch, G. A., Pinsky, B. A., George, K. S., Smith, T. C., & Bertuzzi, S. (2020). Report from the american society for microbiology COVID-19 international summit, 23 march 2020: Value of 755 diagnostic testing for SARS-CoV-2/COVID-19.
- Peeri, N. C., Shrestha, N., Rahman, M. S., Zaki, R., Tan, Z., Bibi, S., Baghbanzadeh, M., Aghamohammadi, N., Zhang, W., & Haque, U. (2020). The SARS, MERS and novel coronavirus (COVID-19) epidemics, the newest and biggest global health threats: what lessons have we learned? *International 760 Journal of Epidemiology*, 2020.
- Pickett, B. E., Sadat, E. L., Zhang, Y., Noronha, J. M., Squires, R. B., Hunt, V., Liu, M., Kumar, S., Zaremba, S., Gu, Z., Zhou, L., Larson, C. N., Dietrich, J., Klem, E. B., & Scheuermann, R. H. (2012). ViPR: an open bioinformatics database and analysis resource for virology research. *Nucleic 765 Acids Research*, 40, D593–8. URL: <https://doi.org/10.1093/nar/gkr859>. doi:10.1093/nar/gkr859.
- Poon, L., Chu, D., & Peiris, M. (2020). Detection of 2019 novel coronavirus (2019-nCoV) in suspected human cases by RT-PCR. *School of Public Health, The University of Hong Kong, Hong Kong*, .
- 770 Rizzo, R., Fiannaca, A., La Rosa, M., & Urso, A. (2015). A deep learning approach to DNA sequence classification. In *International Meeting on Computational Intelligence Methods for Bioinformatics and Biostatistics* (pp. 129–40). Springer.
- Sethy, P. K., & Behera, S. K. (2020). Detection of coronavirus disease (Covid-19) 775 based on deep features. *Preprints, 2020030300*, 2020.

- Soares, F., Villavicencio, A., Fogliatto, F. S., Rigatto, M. H. P., Anzanello, M. J., Idiart, M., & Stevenson, M. (2020). A novel specific artificial intelligence-based method to identify COVID-19 cases using simple blood exams. *medRxiv*, 2020.
- 780 Tahamtan, A., & Ardebili, A. (2020). Real-time RT-PCR in COVID-19 detection: issues affecting the results.
- Tin Kam Ho (1995). Random decision forests. In *Proceedings of 3rd International Conference on Document Analysis and Recognition* (pp. 278–82). volume 1.
- 785 Wang, D., Hu, B., Hu, C., Zhu, F., Liu, X., Zhang, J., Wang, B., Xiang, H., Cheng, Z., Xiong, Y. et al. (2020a). Clinical characteristics of 138 hospitalized patients with 2019 novel coronavirus-infected pneumonia in Wuhan, China. *Jama*, 323, 1061–9.
- Wang, W., Xu, Y., Gao, R., Lu, R., Han, K., Wu, G., & Tan, W. (2020b).  
790 Detection of SARS-CoV-2 in different types of clinical specimens. *Jama*, 2020.
- WHO (2020a). *Advice on the use of point-of-care immunodiagnostic tests for COVID-19*. World Health Organization. URL: [www.who.int/news-room/commentaries/detail/advice-on-the-use-of-point-of-care-immunodiagnostic-tests-for-covid-19](http://www.who.int/news-room/commentaries/detail/advice-on-the-use-of-point-of-care-immunodiagnostic-tests-for-covid-19)  
795 last accessed: 2020 may. 17.
- WHO (2020b). *WHO Coronavirus Disease (Covid-19) Dashboard*. World Health Organization. URL: <https://covid19.who.int/> last accessed: 2020 may 17.
- Wilder-Smith, A., & Freedman, D. (2020). Isolation, quarantine, social distancing and community containment: pivotal role for old-style public health  
800 measures in the novel coronavirus (2019-nCoV) outbreak. *Journal of travel medicine*, 27, taaa020.

- Zhang, J., & Harmon, K. M. (2020). RNA extraction from swine samples and detection of influenza A virus in swine by real-time RT-PCR. In *Animal Influenza Virus* (pp. 295–310). Springer.
- 805 Zhang, P., Gao, Q., Wang, T., Ke, Y., Mo, F., Jia, R., Liu, W., Liu, L., Zheng, S., Liu, Y. et al. (2020). Evaluation of recombinant nucleocapsid and spike proteins for serological diagnosis of novel coronavirus disease 2019 (COVID-19). *MedRxiv*, 2020.
- 810 Zhou, F., Yu, T., Du, R., Fan, G., Liu, Y., Liu, Z., Xiang, J., Wang, Y., Song, B., Gu, X. et al. (2020). Clinical course and risk factors for mortality of adult inpatients with COVID-19 in Wuhan, China: a retrospective cohort study. *The Lancet*, .
